# Supplementary material
Source: publisher figshare collection journal article supplement (https://acs.figshare.com/ndownloader/files/4213894)

**Supporting Information for Review Only**

**Tandem One-Pot Synthesis of Polysubstituted Pyridines using the Blaise  
Reaction Intermediate and 1,3-Enynes**

*Yu Sung Chun, Jun Hee Lee, Ju Hyun Kim, Young Ok Ko and Sang-gi Lee\**

Department of Chemistry and Nano Science, Ewha Womans University, 120-750 Seoul,  
Korea

Copies of HRMS-Spectra for all Compounds

## Spectrum for 4aa

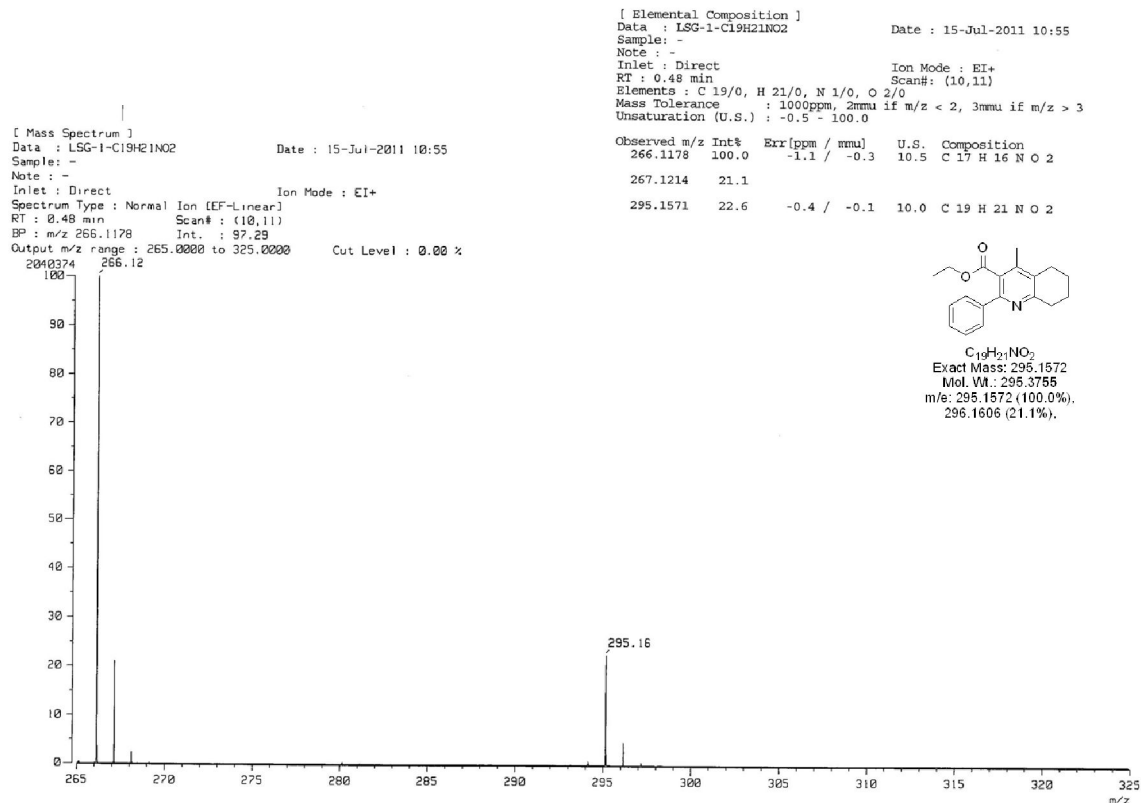

## Spectrum for 4ba

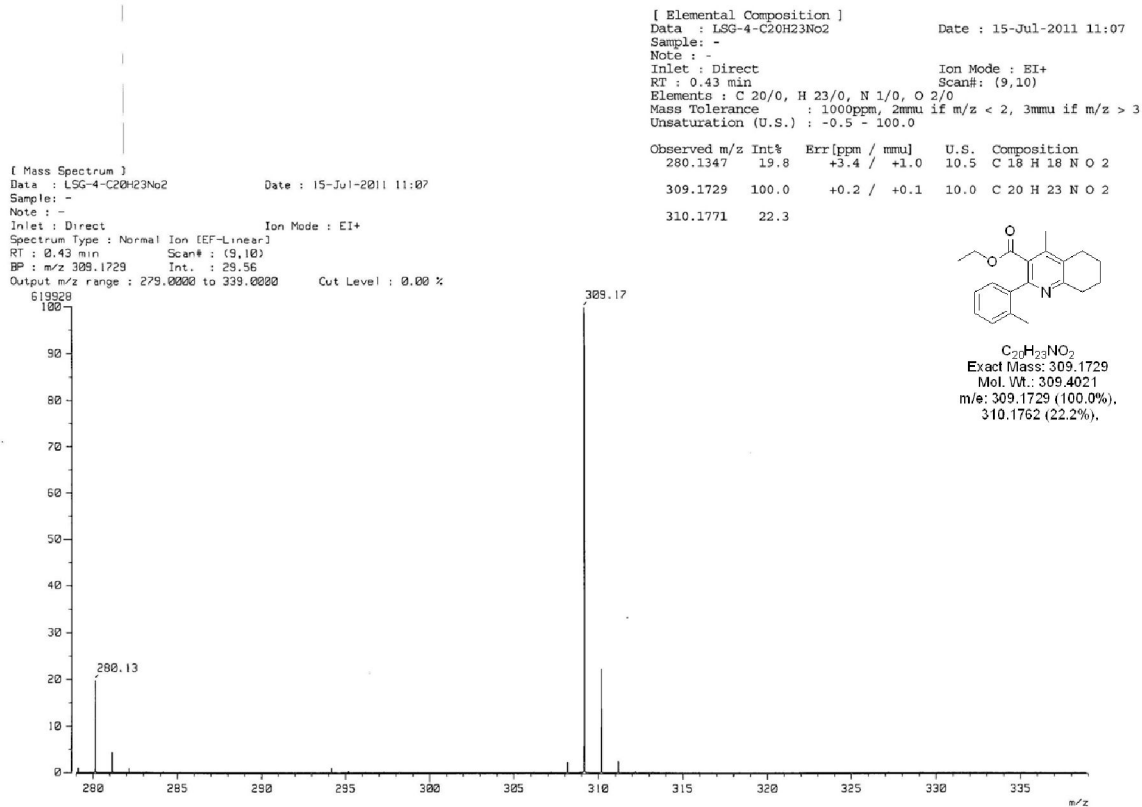

## Spectrum for 4ca

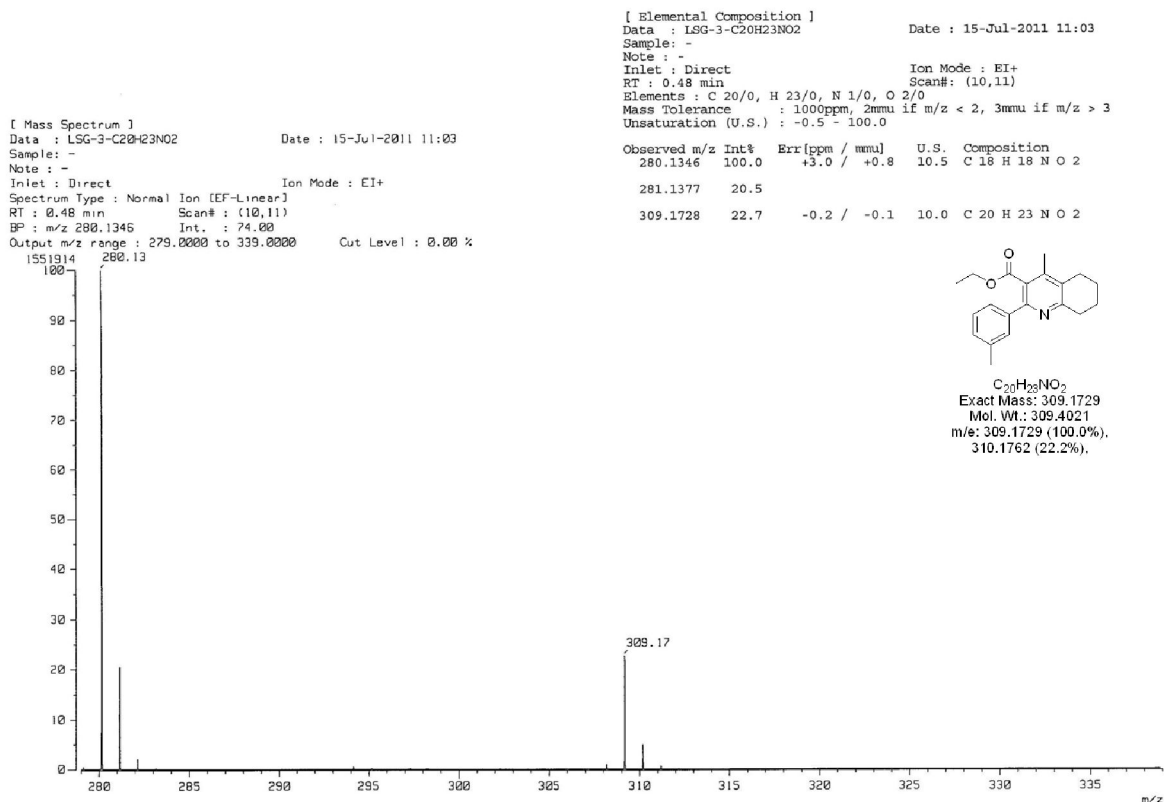

## Spectrum for 4da

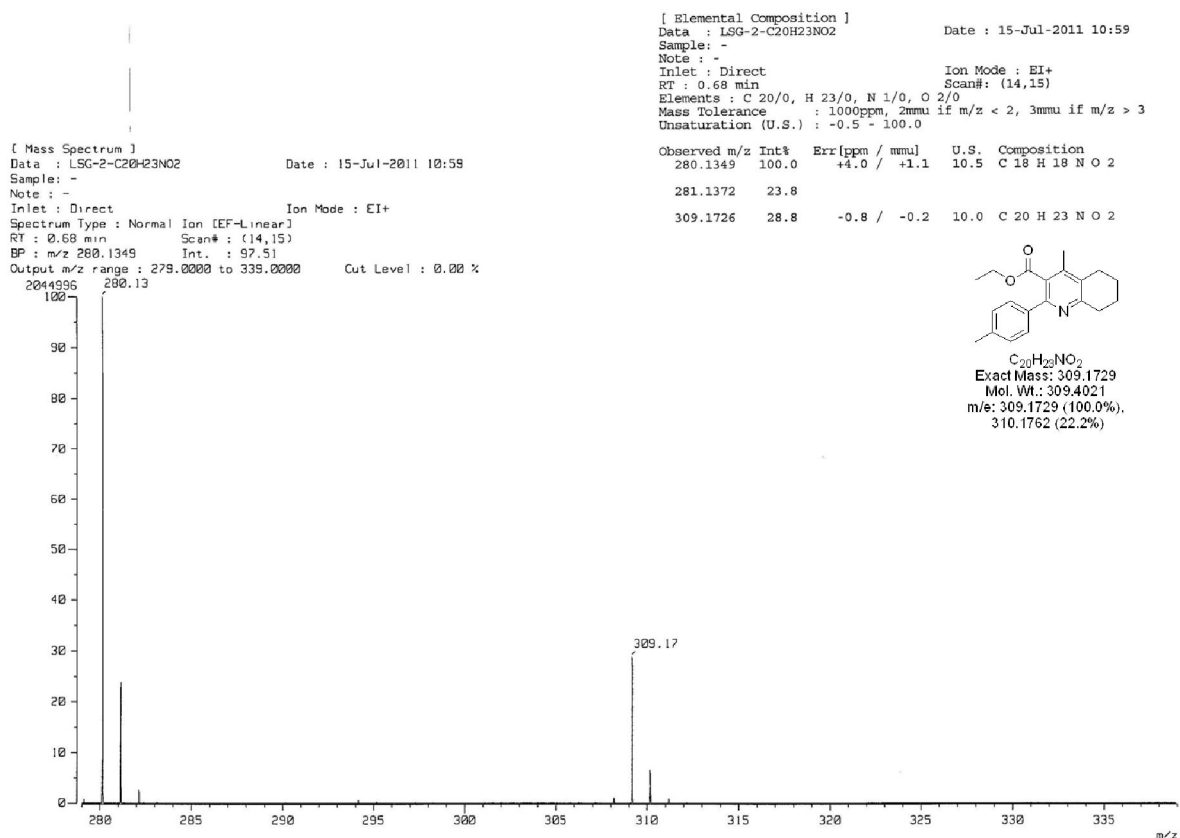

## Spectrum for 4ea

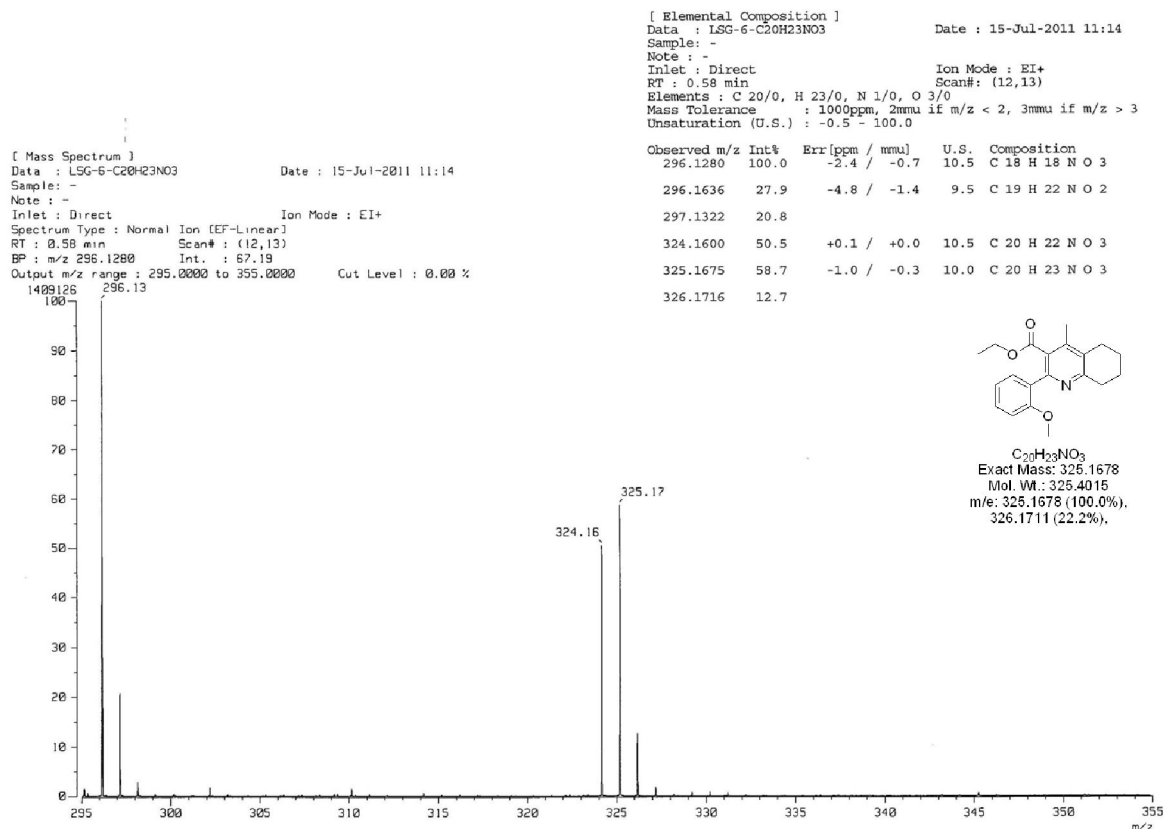

## Spectrum for 4fa

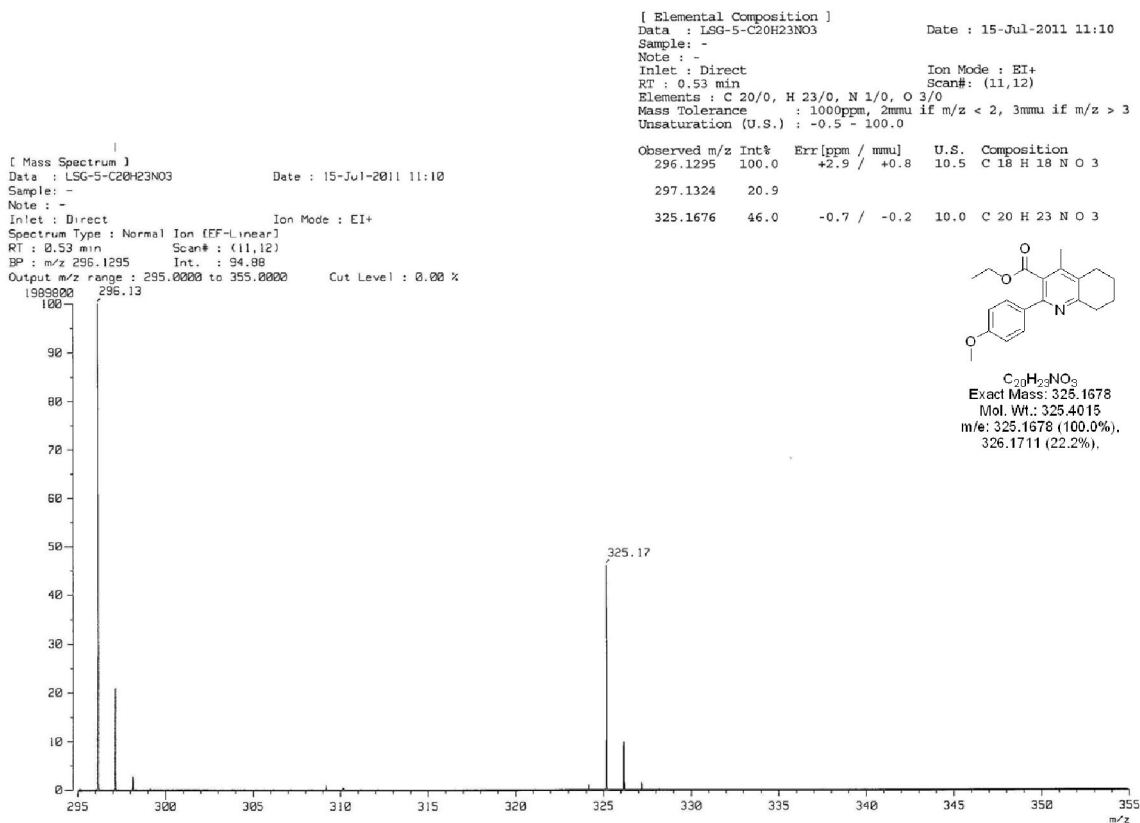

## Spectrum for 4ga

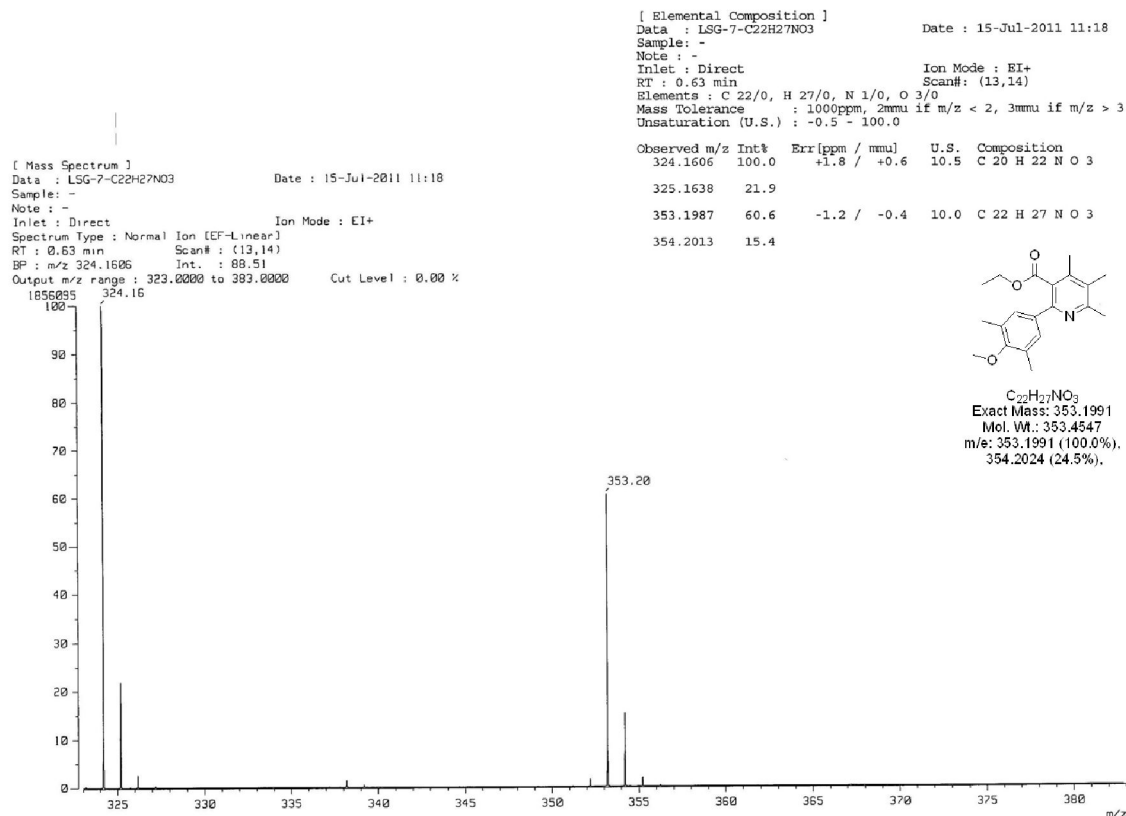

## Spectrum for 4ha

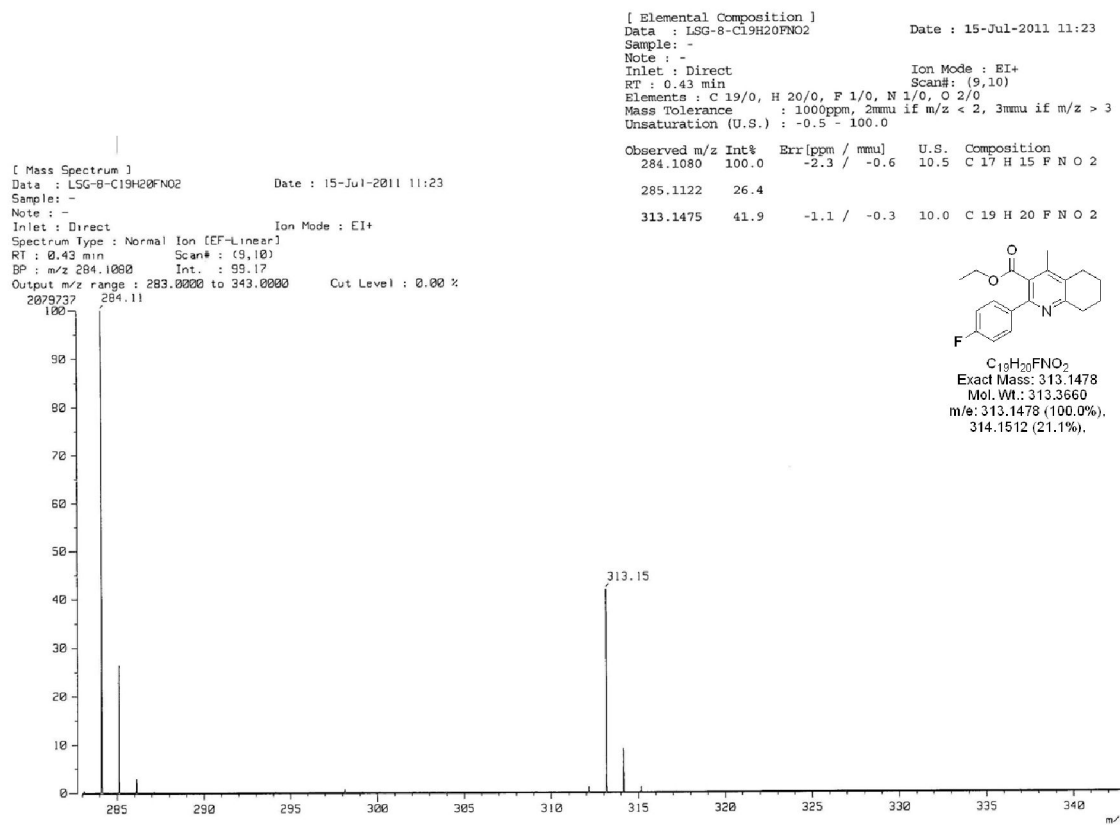

## Spectrum for 4ia

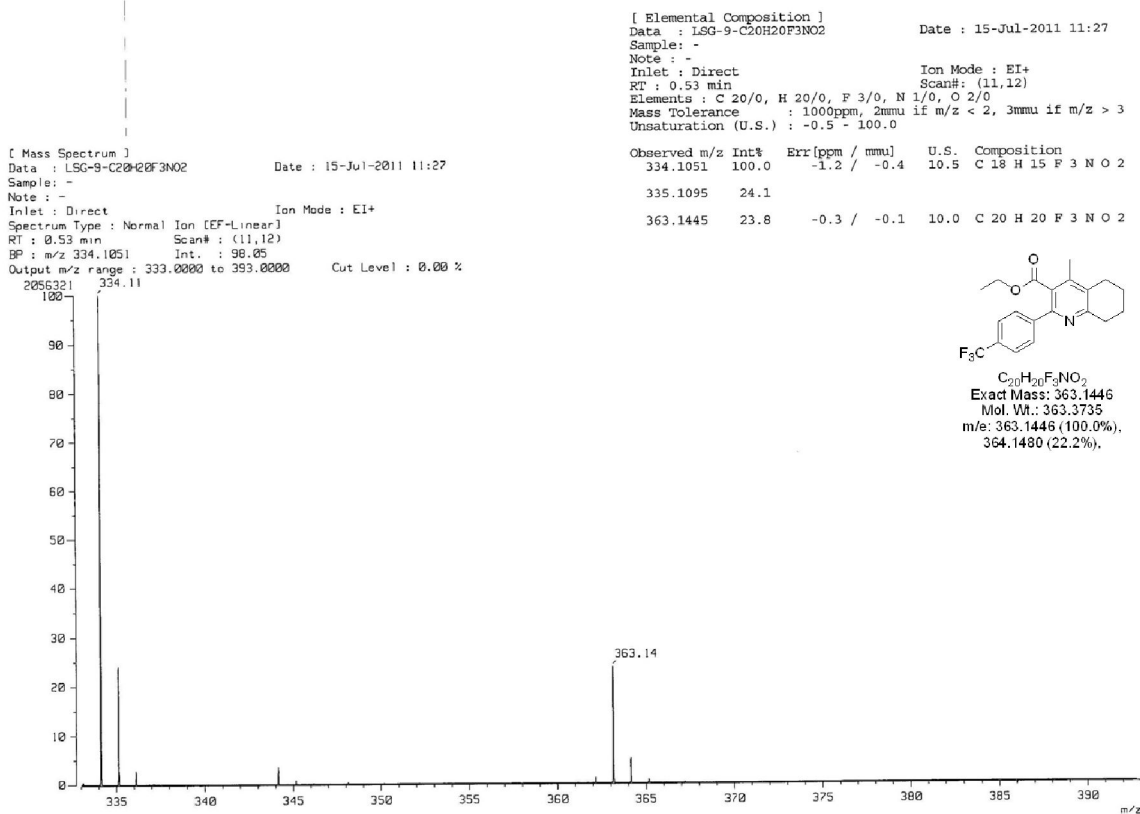

## Spectrum for 4ja

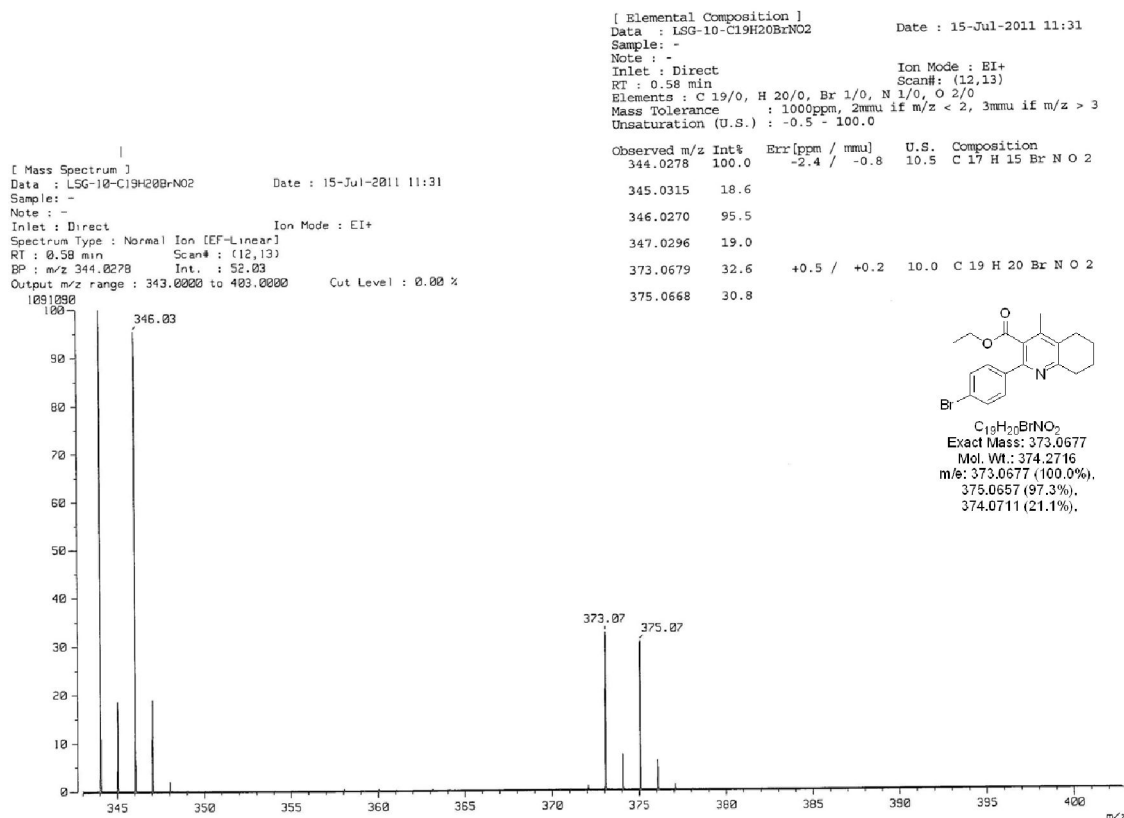

## Spectrum for 4ka

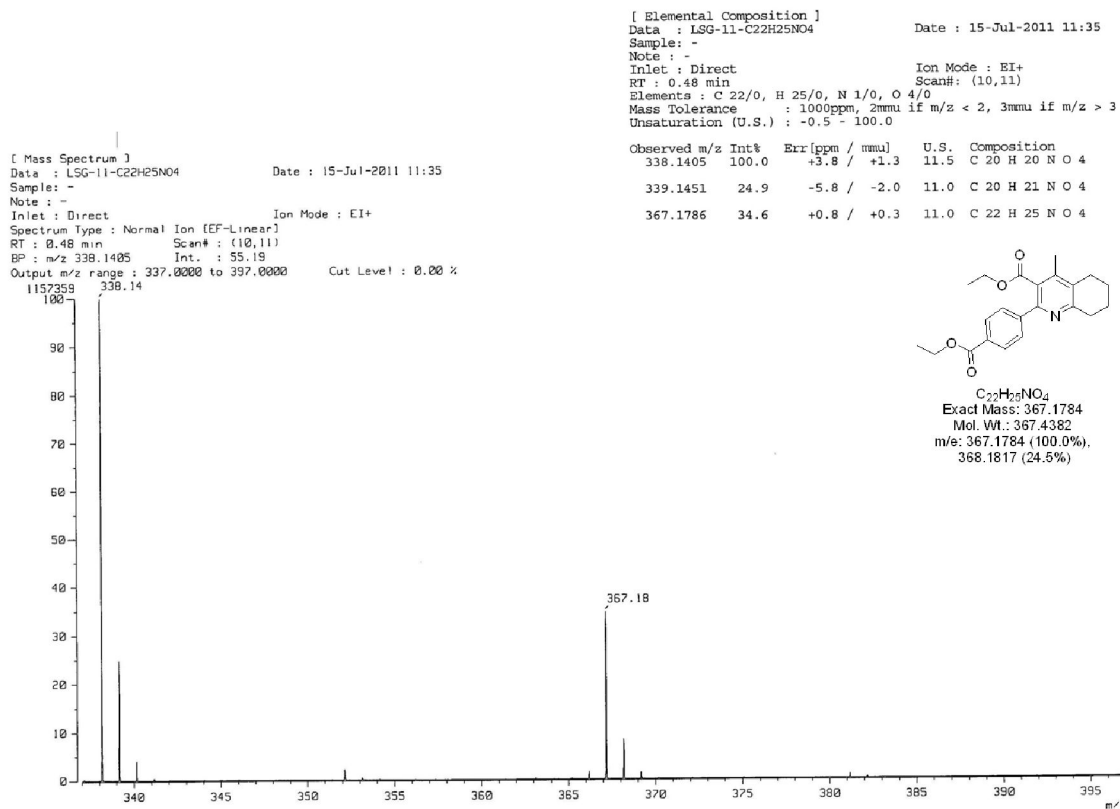

## Spectrum for 4la

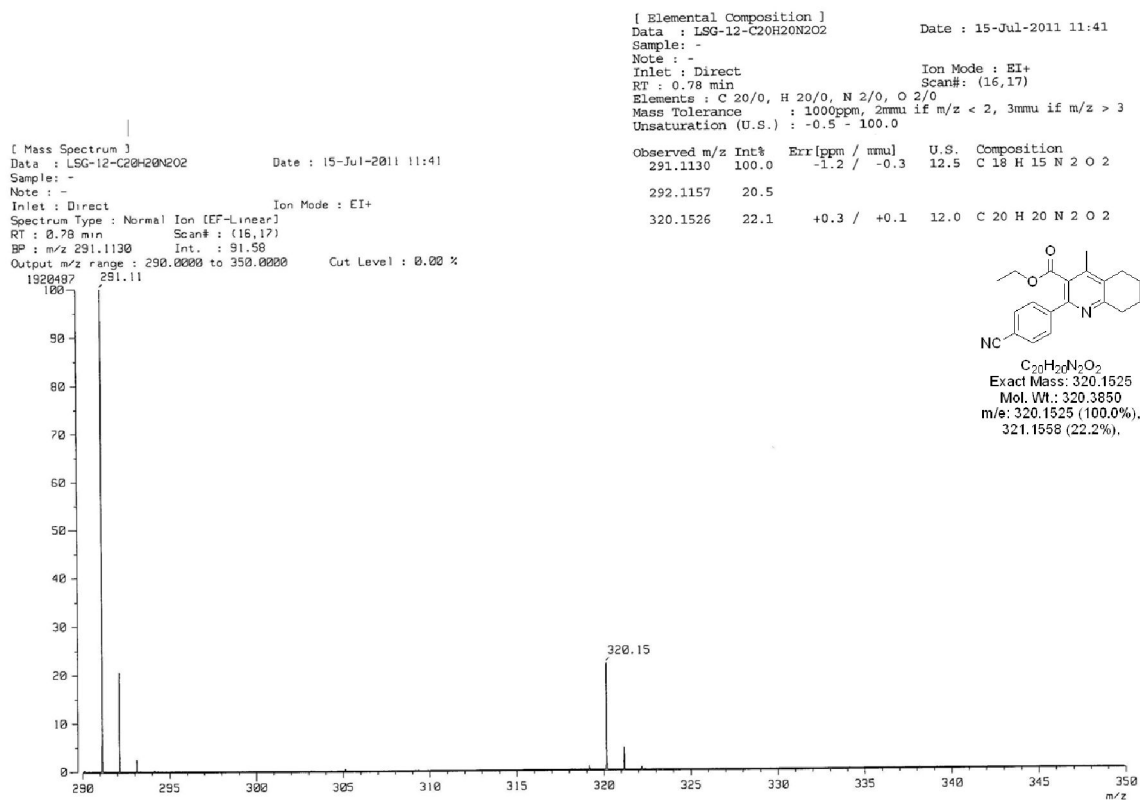

## Spectrum for 4ma

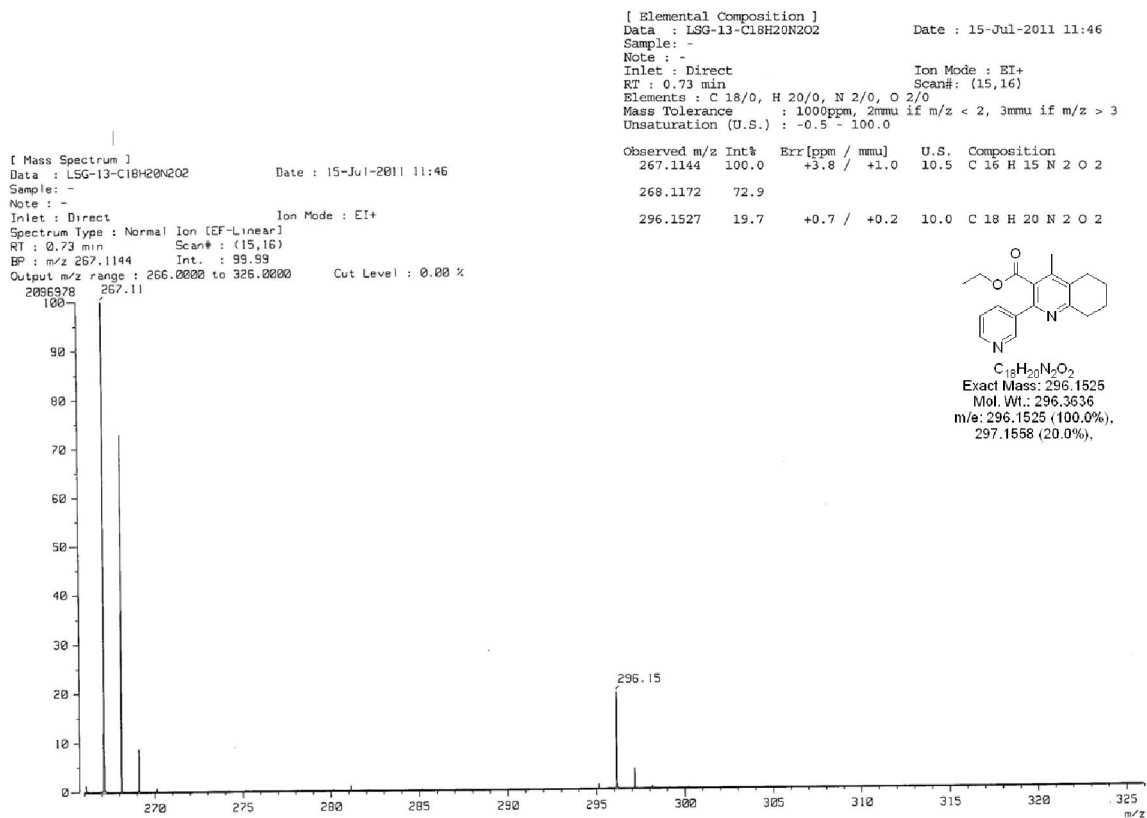

## Spectrum for 4na

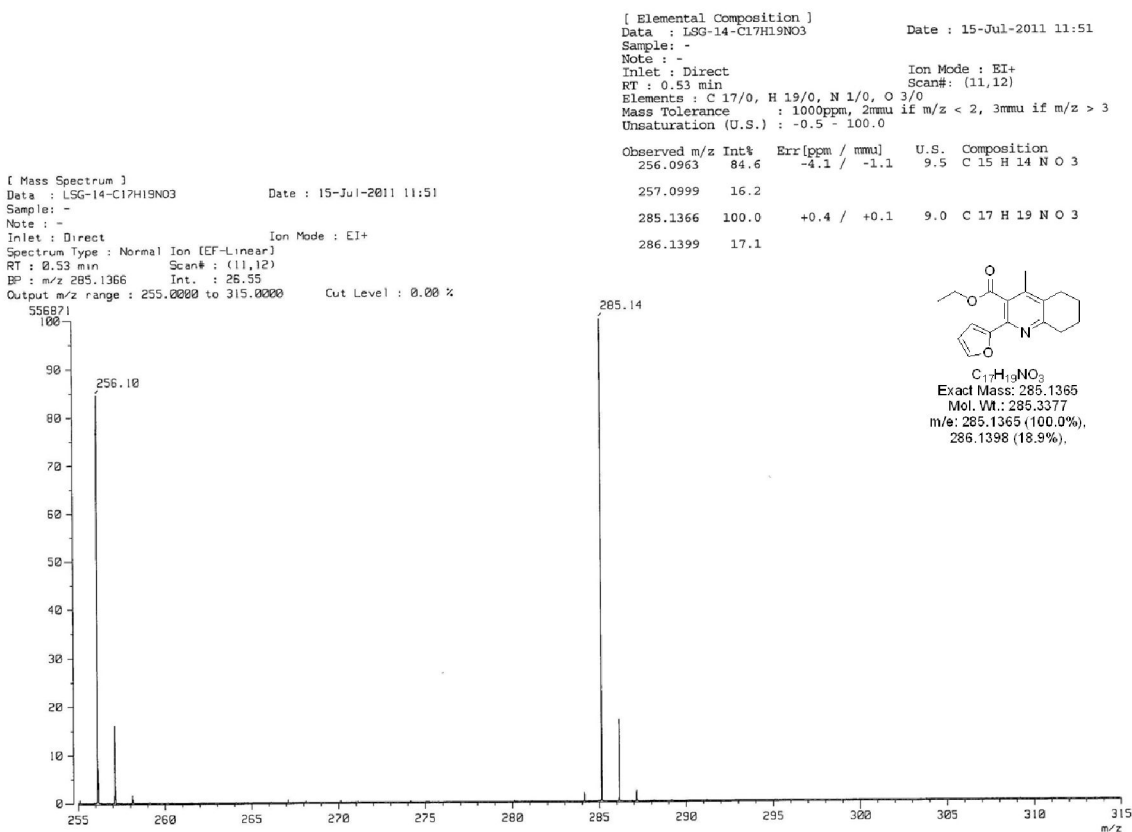



## Spectrum for 40a

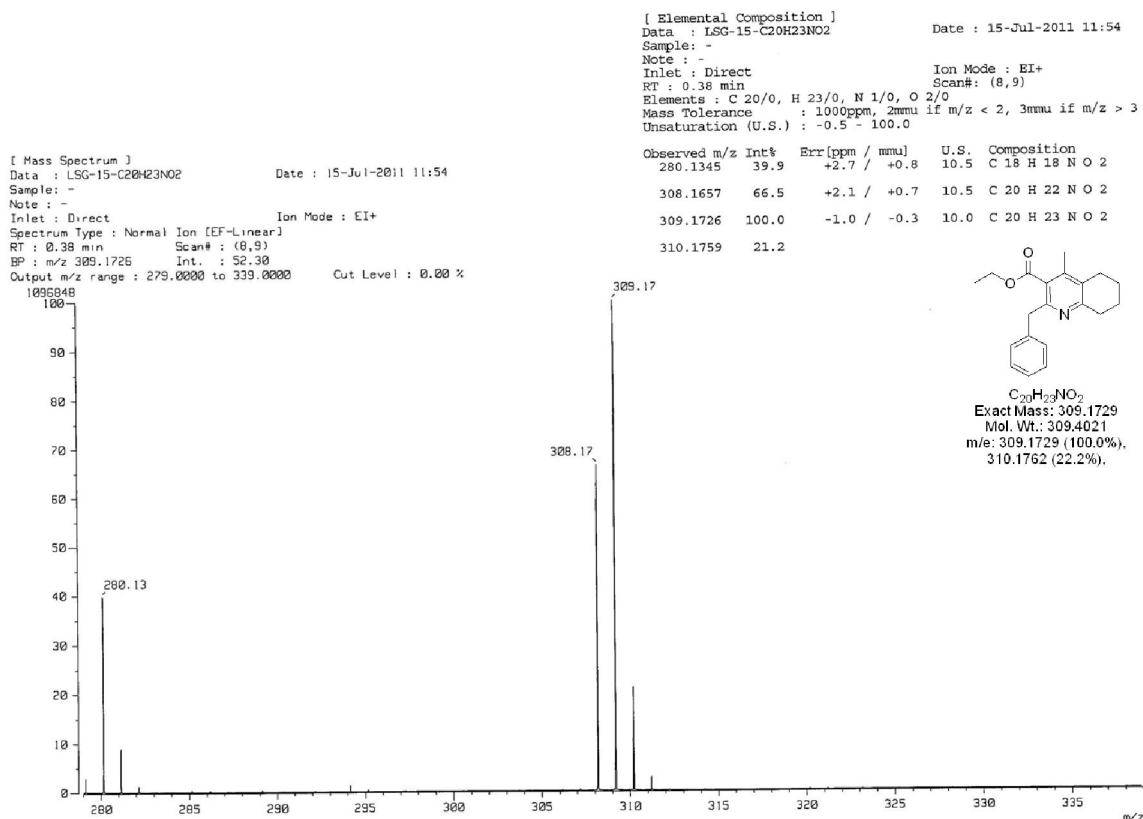

## Spectrum for 4pa

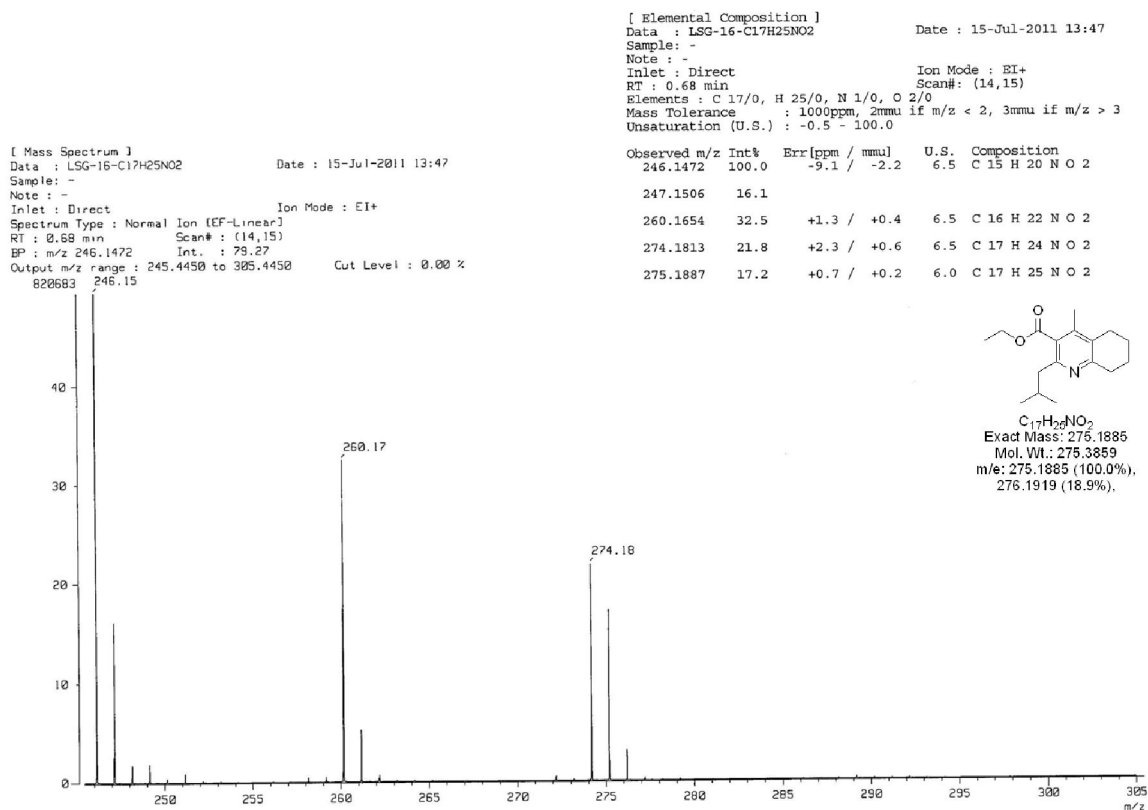

## Spectrum for 4ab

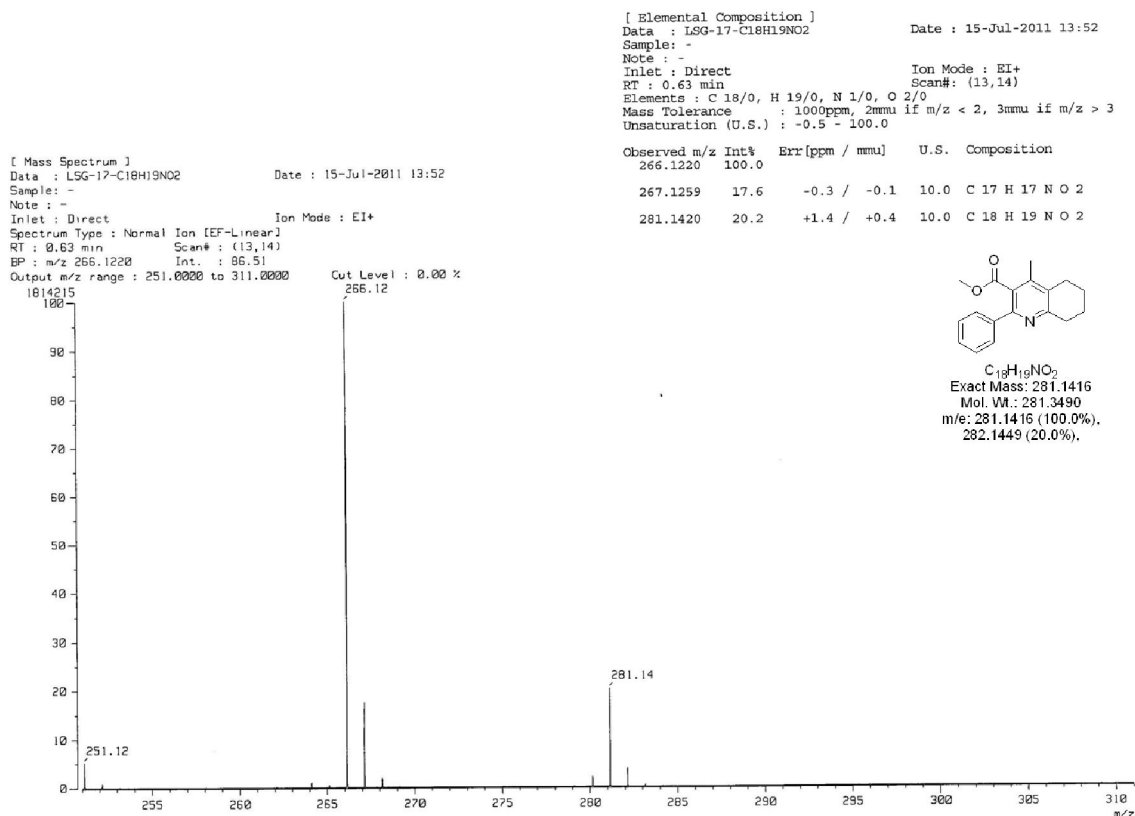

## Spectrum for 4ac

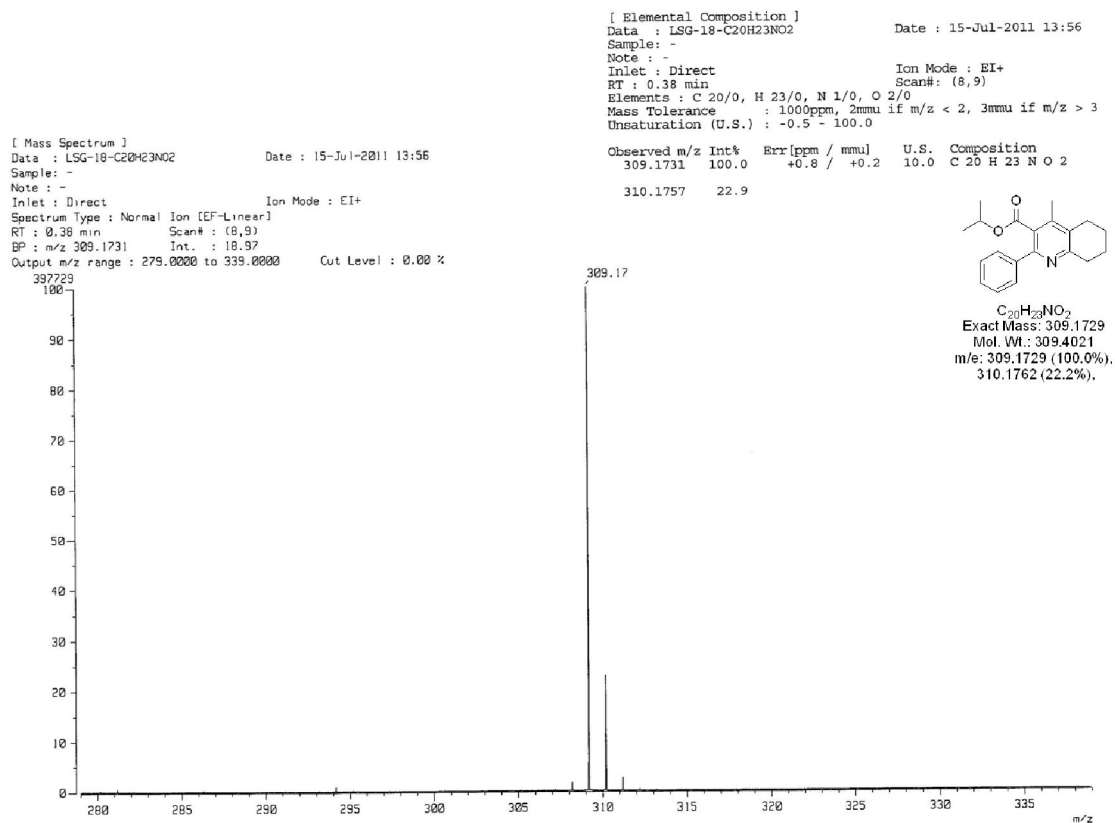

## Spectrum for 4ad

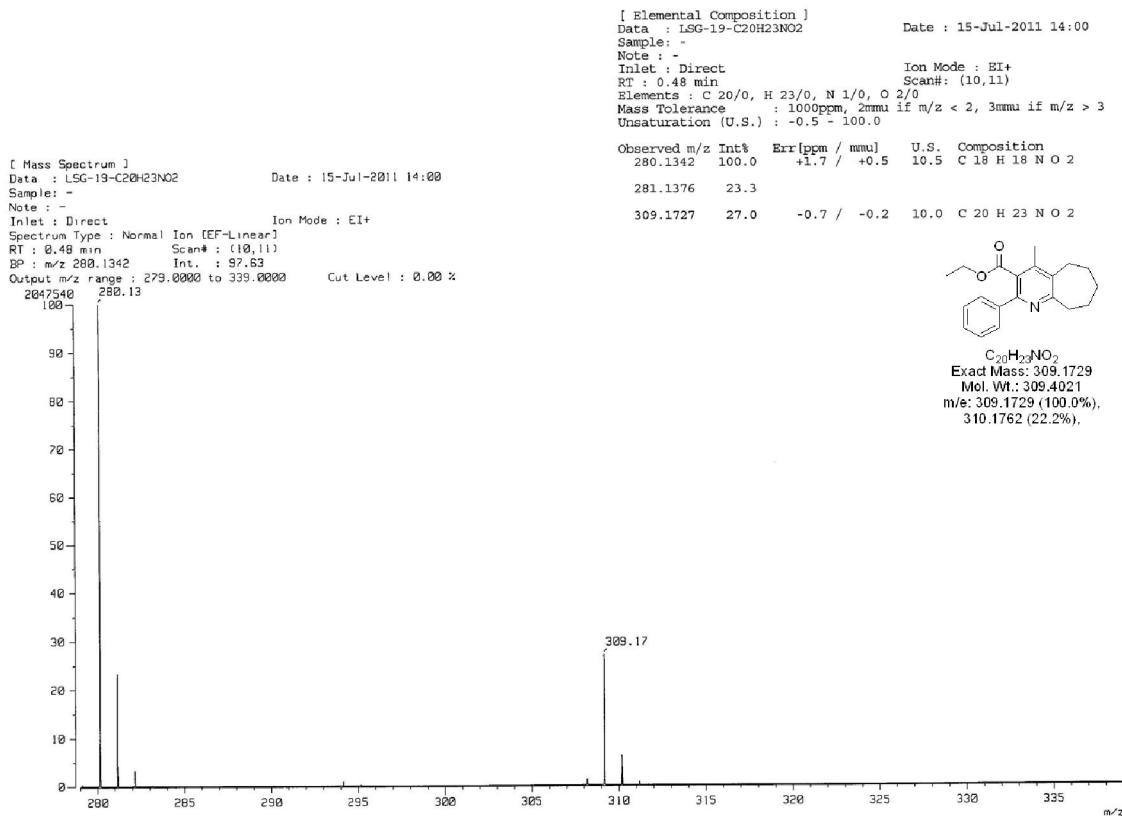

## Spectrum for 4ae

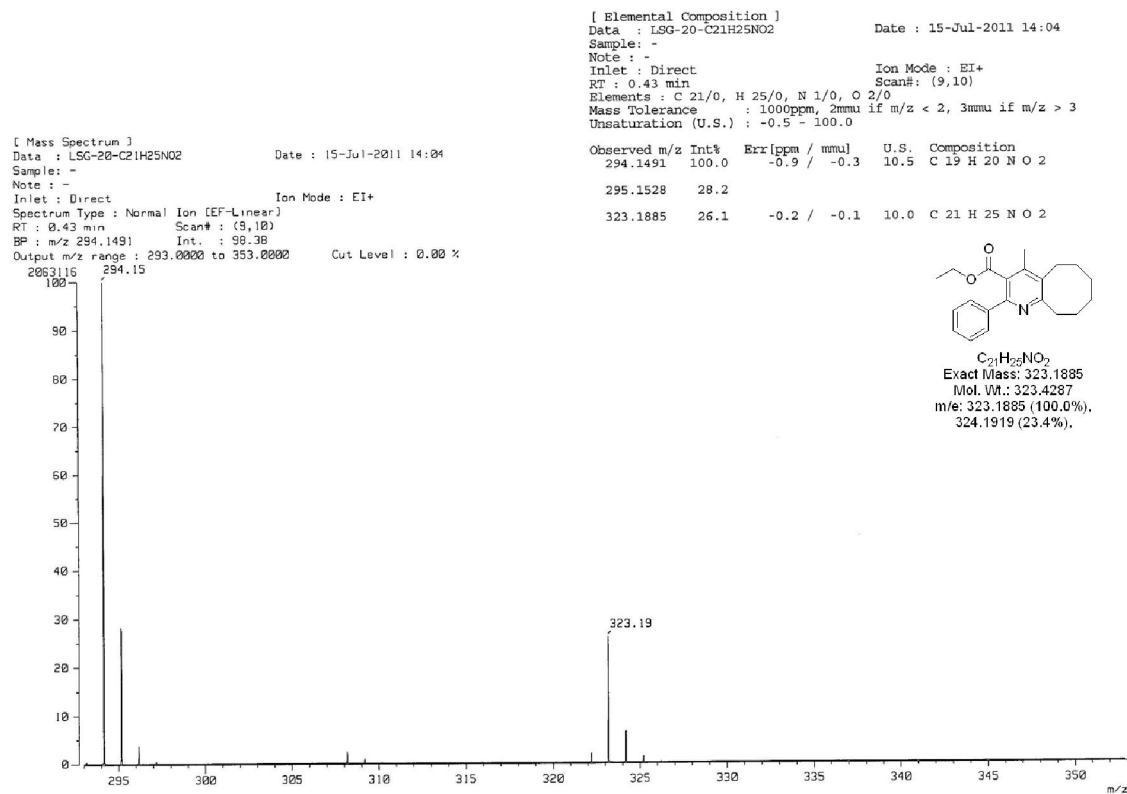

## Spectrum for 4af

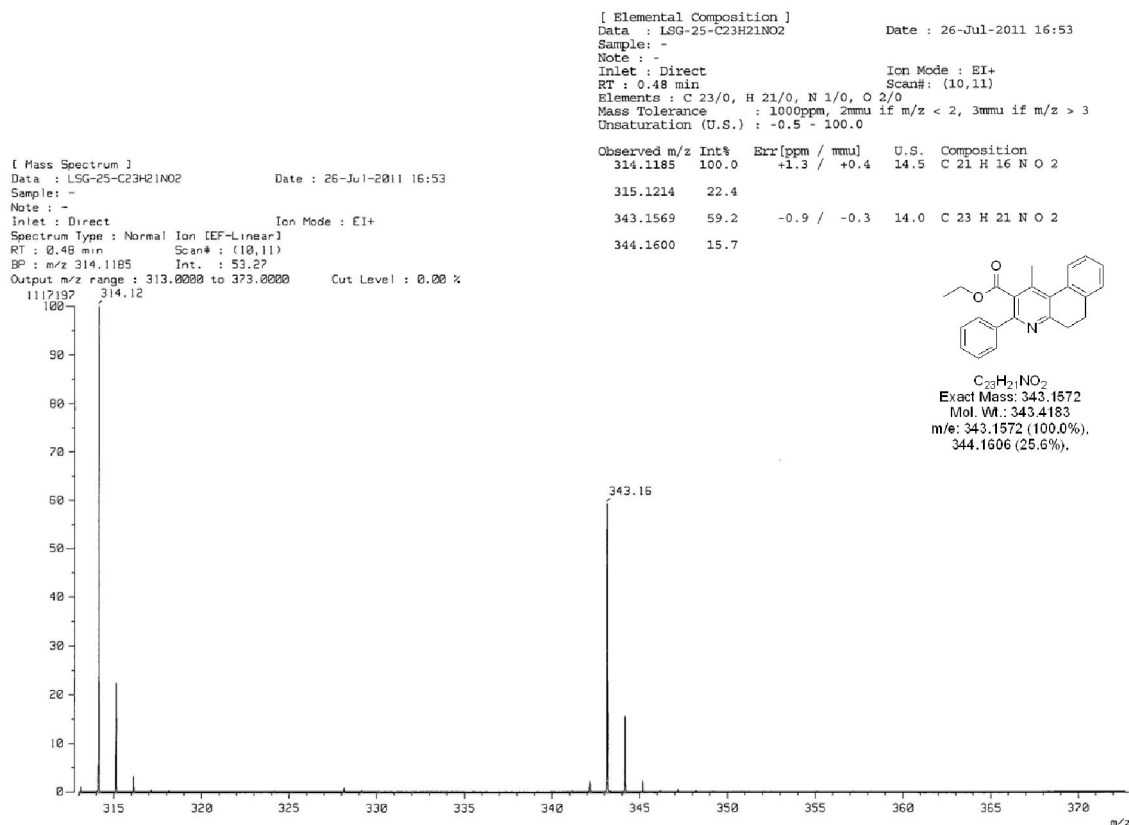

## Spectrum for 4ag

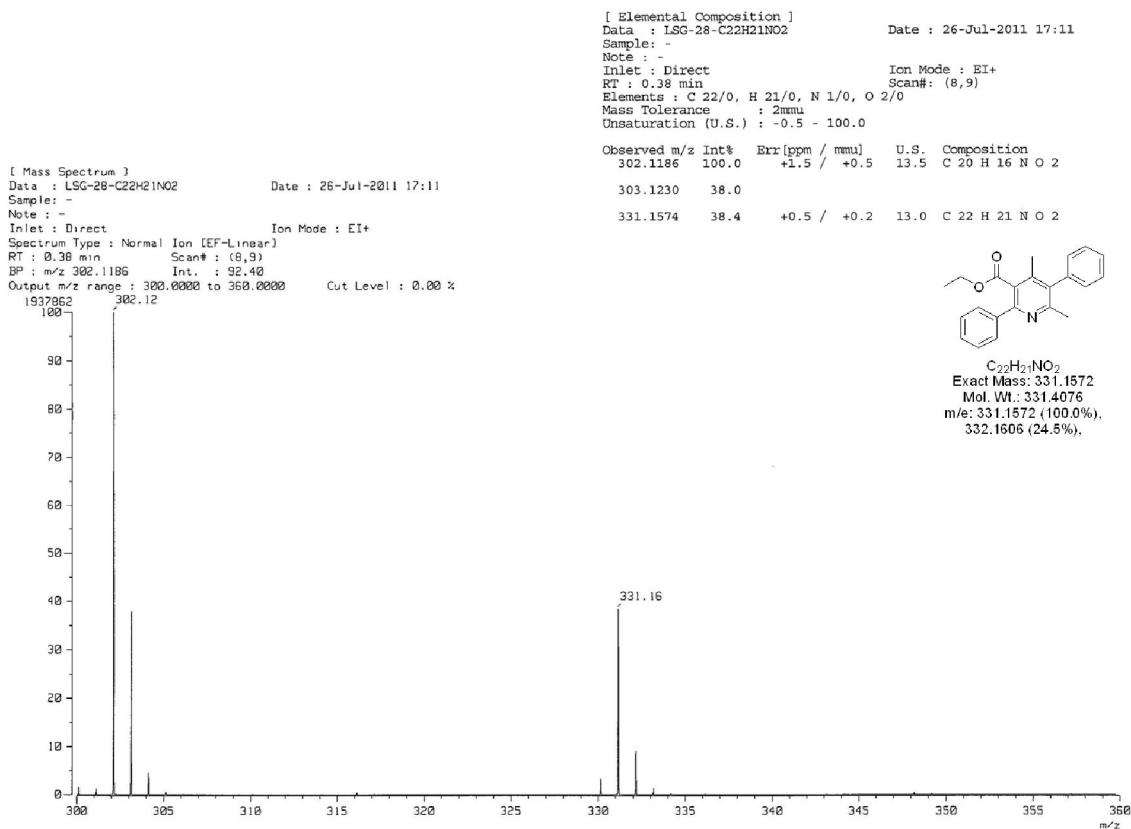

## Spectrum for 4ah

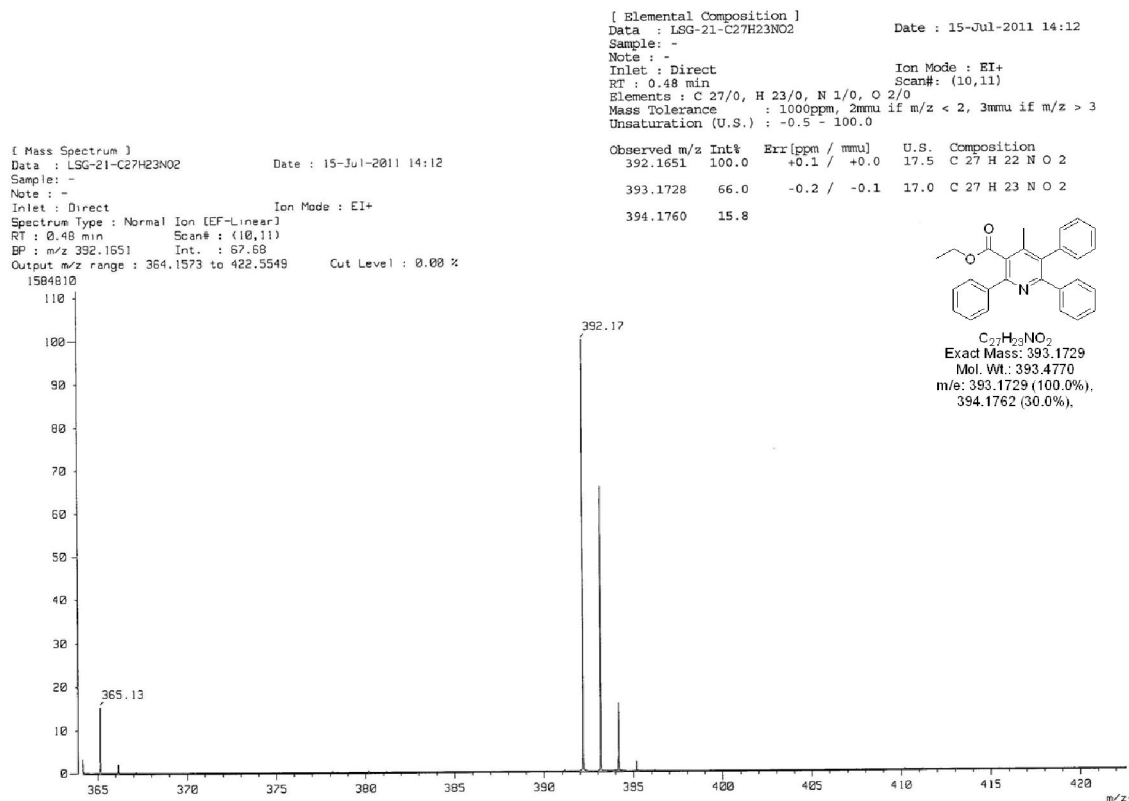

## Spectrum for 4ai

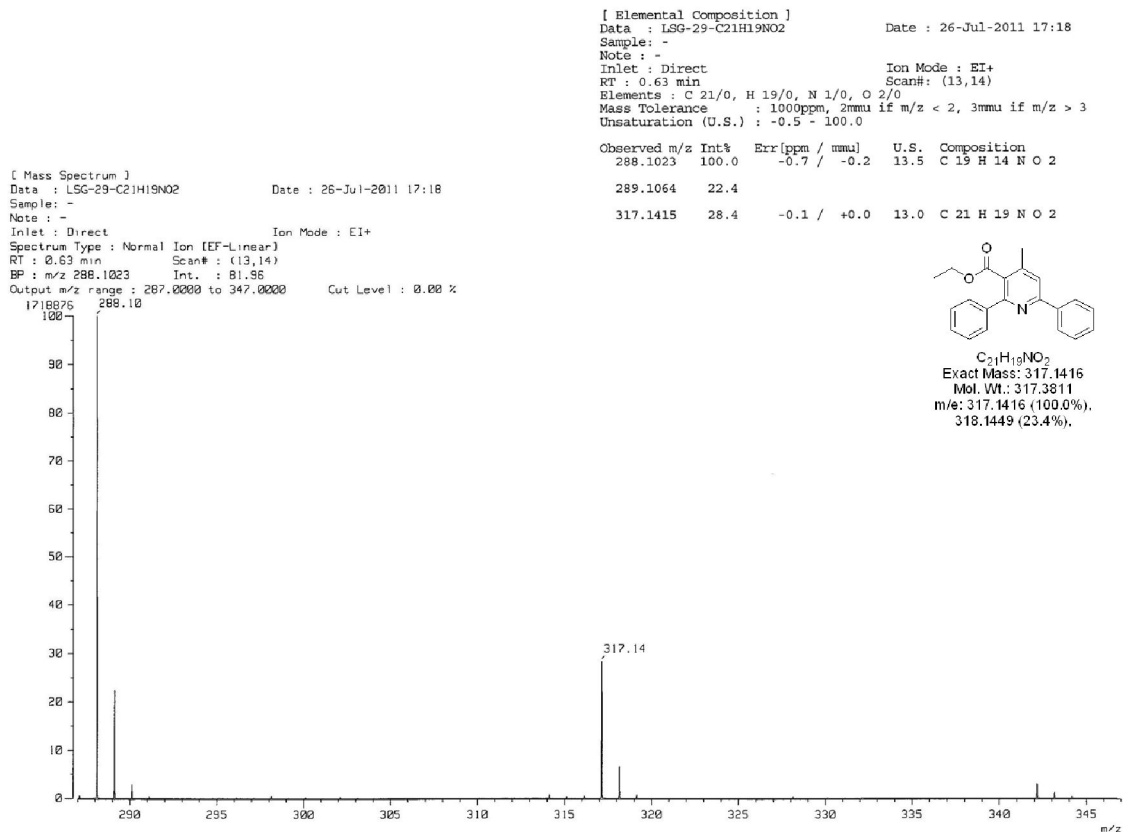

## Spectrum for 4aj

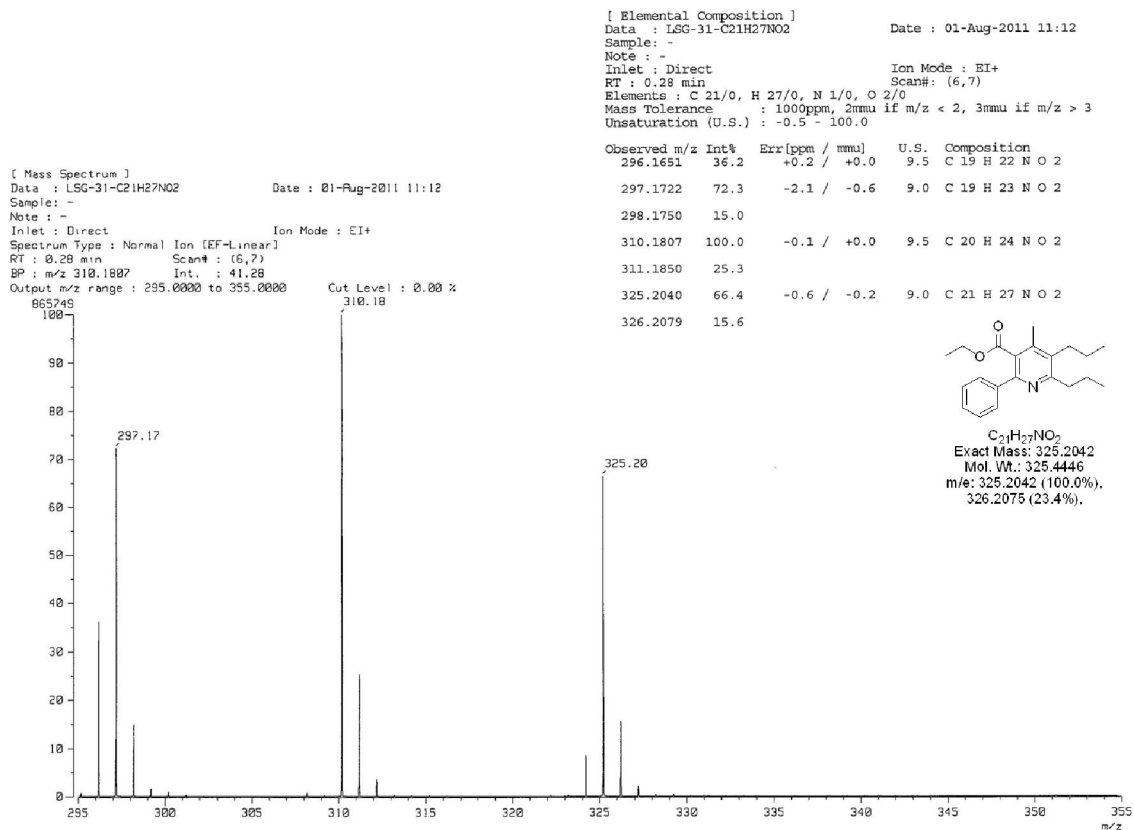

## Spectrum for 4lb

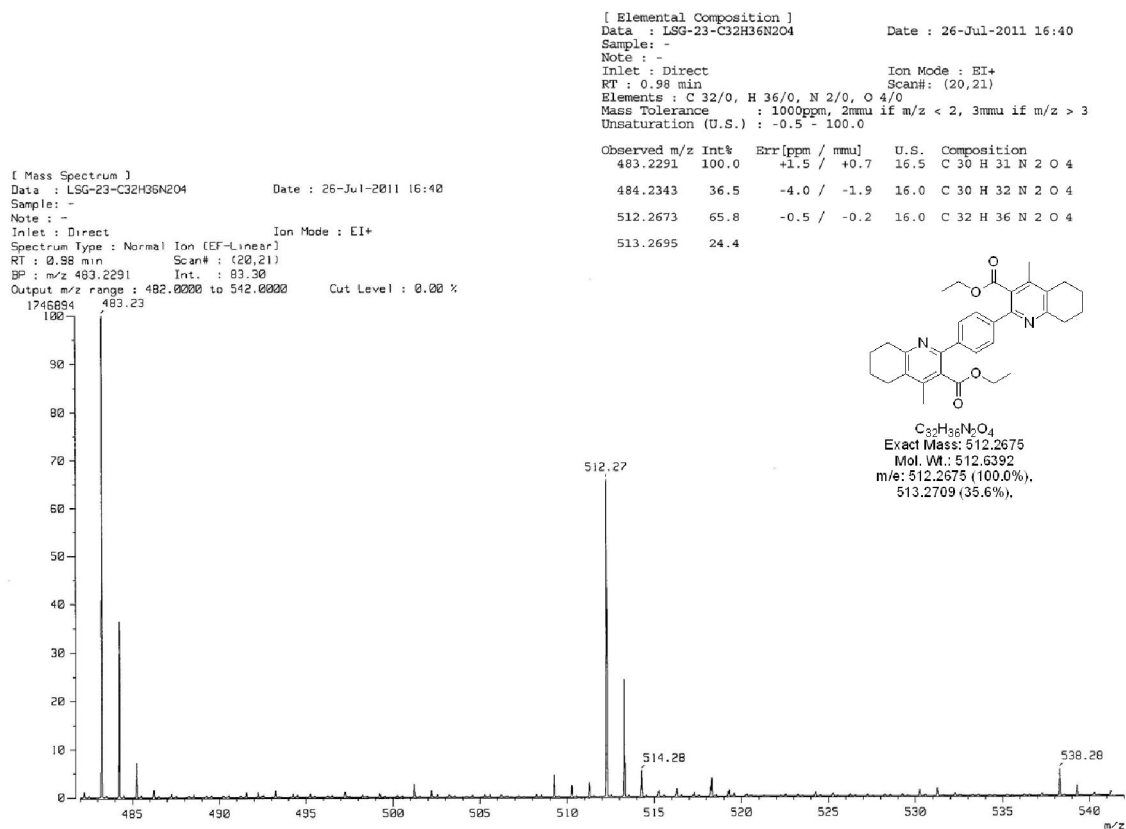

## Spectrum for 8

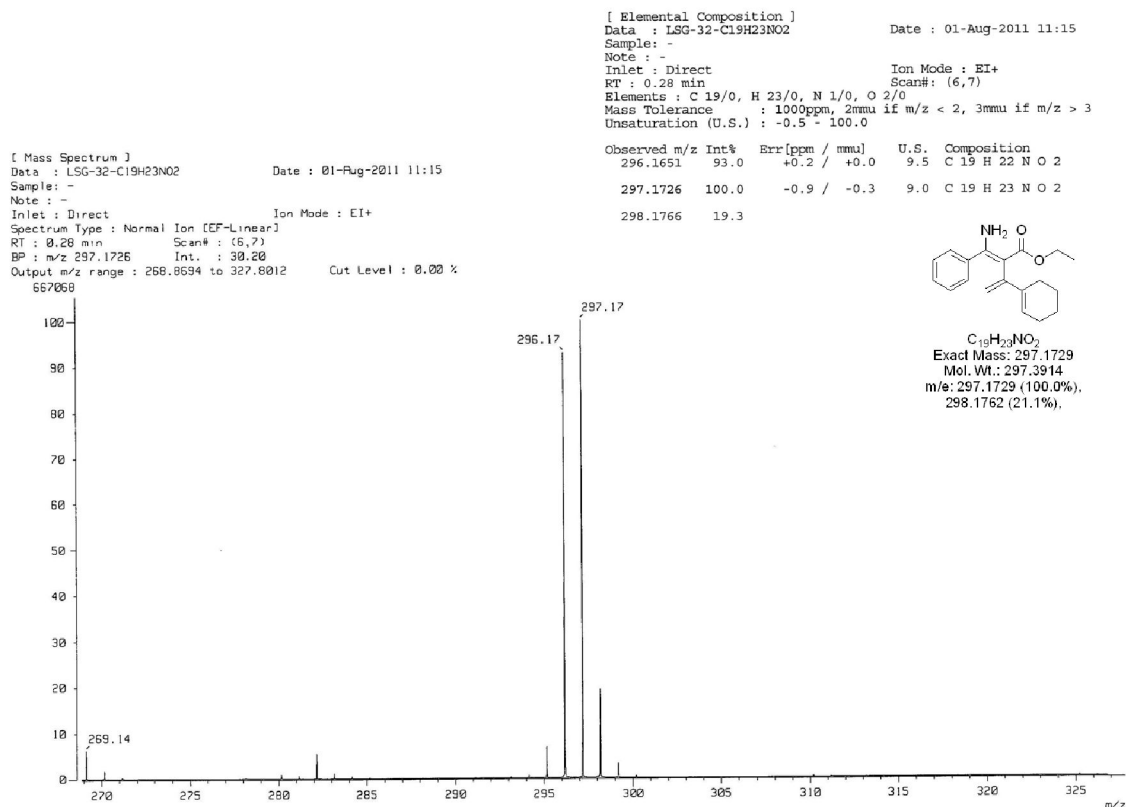

## Spectrum for 9

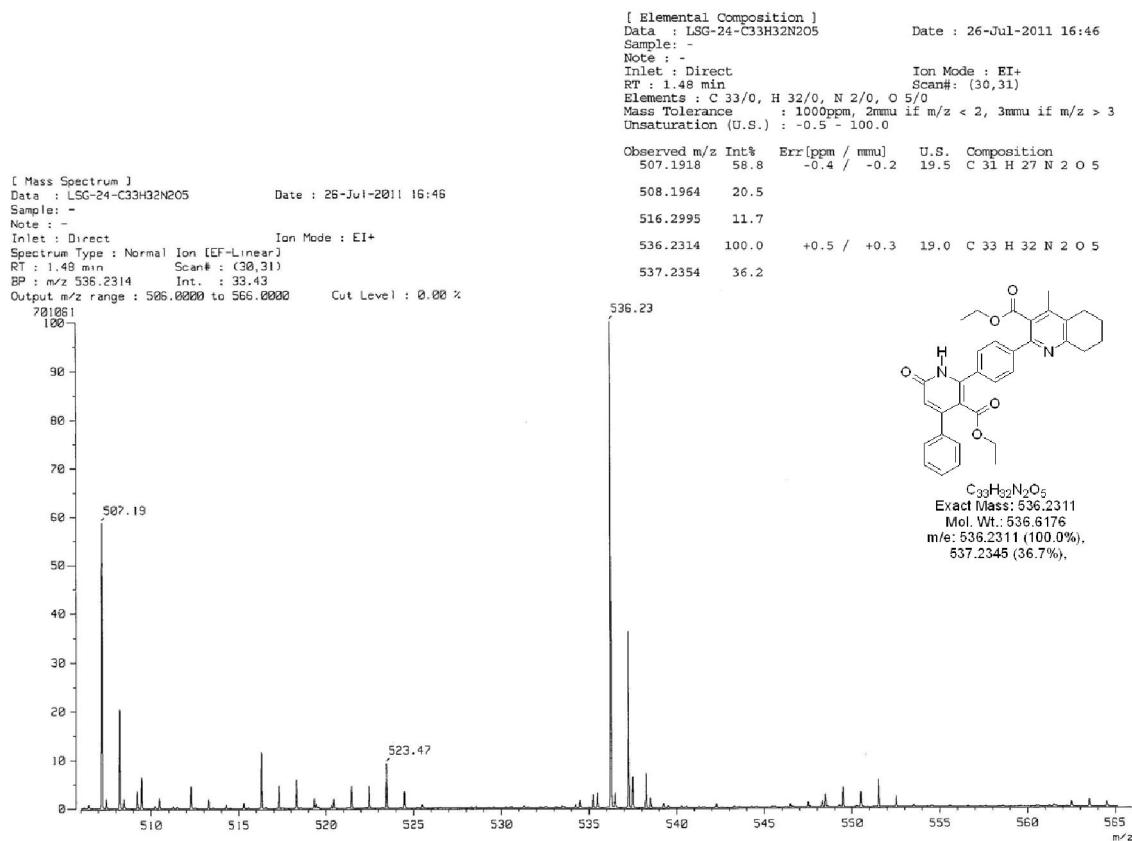

Supplement: Supplementary file 1 [file 4213894]
